# Supplementary material
Source: PubMed Central journal article supplement (PMC3641000)

## SUPPLEMENTARY FIGURE LEGENDS

**Supplementary Figure 1. Effect of 2-deoxy-D-glucose on cell viability.** Cells were treated with PDGF in the absence or presence of 2-deoxy-D-glucose (2-DG, 20 mM) for 48 h. Cell viability was assessed by measuring LDH activity in the cell lysates and media. Data are presented as means  $\pm$  SEM; n=3–5 per group. N.S. is used to express non-significant differences between groups.

**Supplementary Figure 2. Changes in cell cycle proteins in VSMC treated with PDGF: Effects of PI3K inhibitor and 2-deoxy-D-glucose.** VSMC were treated with PDGF (10 ng/ml) for 24 h in the absence or presence of LY-294002 (LY, 10  $\mu$ M) or 2-DG (20 mM). Proteins in cell lysates were used to examine phospho-Rb (Ser<sup>807/811</sup>), cyclin D<sub>1</sub> and  $\beta$ -actin (loading control) by Western blotting. **(B and C)** Bar graphs for grouped densitometric values of phospho-Rb (Ser<sup>807/811</sup>) and cyclin D Western blots, respectively. Data are presented as means  $\pm$  SEM; n=3 per group, \*p<0.05 vs. CTRL, #p<0.05 vs. PDGF, \$p<0.05 vs. LY-294002.

**Supplementary Figure 3. Effect of PDGF on ATP and ATP/ADP ratios in VSMC.** VSMC pre-treated with LY-294002 (LY, 10  $\mu$ M) or 2-DG (20 mM) for 1 h were exposed to PDGF (10 ng/ml, 24 h). Cellular nucleotides were isolated and analyzed by HPLC. **(A)** Total levels of intracellular ATP. **(B)** ATP/ADP ratios. Data are presented as means  $\pm$  SEM; n=3 per group, \*p<0.05 vs. CTRL, #p<0.05 vs. PDGF.

**Supplementary Figure 4. Mitochondrial function assay.** Schematic showing parameters assessed by XF analysis. To probe individual components of respiration that contributed to the consumption of oxygen, oligomycin (1  $\mu$ g/ml), FCCP (1  $\mu$ M), and antimycin A (10  $\mu$ M) were injected sequentially. This allowed for an estimation of the contribution of non-ATP-linked oxygen consumption (proton leak; Leak) and ATP-linked mitochondrial oxygen consumption (ATP). The maximal respiratory capacity was determined using the FCCP-stimulated rate. The reserve capacity is represented by the maximal respiratory capacity subtracted from the baseline OCR. The residual oxygen consumption that occurred after addition of antimycin A was ascribed to non-mitochondrial sources and was subtracted from all values in the analysis.

**Supplementary Figure 5. Effect of PDGF on mitochondrial membrane potential, protein expression, and enzymatic activity.** Mitochondrial membrane potential, citrate synthase activity, complex IV activity (cytochrome c oxidase), mitochondrial protein expression, pyruvate dehydrogenase (PDH) E-1 $\alpha$  subunit expression and phosphorylation as well as pyruvate dehydrogenase kinase -1 (PDK-1) expression were determined in VSMC treated with PDGF (10 ng/ml) for 24 h. **(A)** Mitochondrial membrane potential was assessed using the ratio of red to green JC-1 fluorescence. **(B)** Citrate synthase activity was examined after incubation of VSMC with vehicle (CTRL) or PDGF (10 ng/ml). **(C)**

Cytochrome c oxidase activity was similarly determined after vehicle (CTRL) or PDGF treatment. Data for A, B and C are presented as means  $\pm$  SEM; n=3–6 per group, \*p<0.05 vs. CTRL. **(D)** Representative Western blots are shown for Cytochrome c (Cyt-c), complex III core 2 protein (C III-core 2), complex II 70kD protein (C II-70kD), voltage-dependent anion channel (VDAC), complex IV subunit 1 (C IV-1), complex I 39kD protein (C I-39kD), and  $\beta$ -actin (loading control) after PDGF treatment for 24 h. Grouped densitometric values shown to the right of each representative Western blot are presented as mean fold change vs. control  $\pm$  SEM; n=3 per group. **(E)** Representative Western blots for PDH E-1 $\alpha$  subunit phosphorylation at Ser<sup>293</sup> and total protein expression, as well as PDK-1 after pre-treatment of VSMC with LY-294002 (LY, 10  $\mu$ M) or 2-DG (20 mM) for 1 h followed by exposure to PDGF (10 ng/ml) for 24 h. Data values are presented as mean fold change vs. control  $\pm$  SEM; n=3 per group.

Supplementary Figure 1

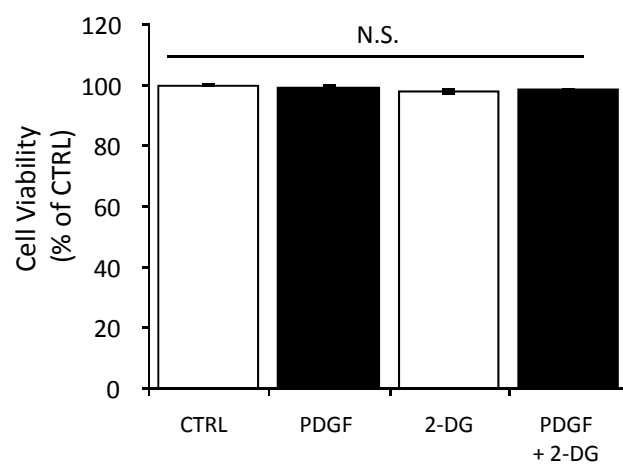

## Supplementary Figure 2

A.

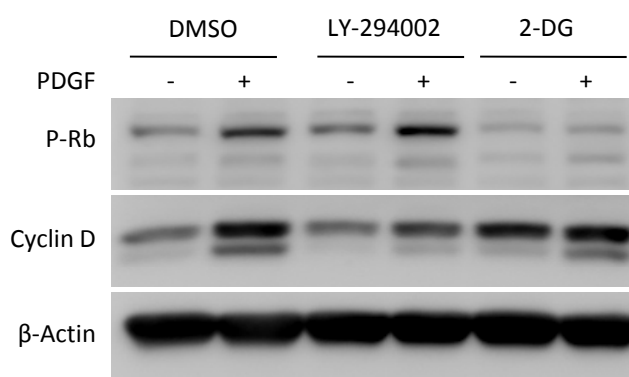

B.

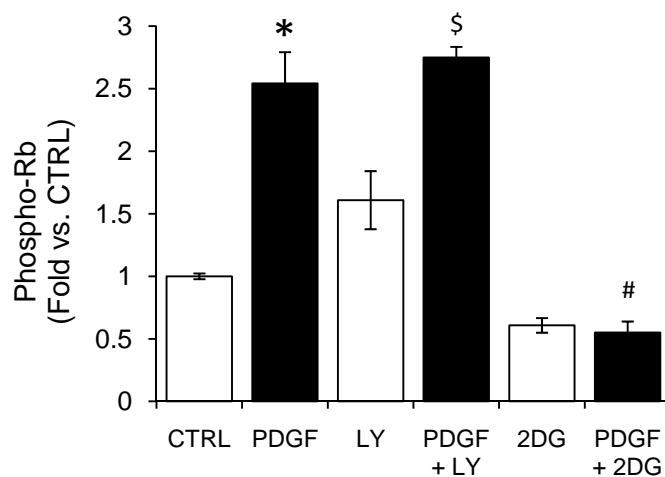

C.

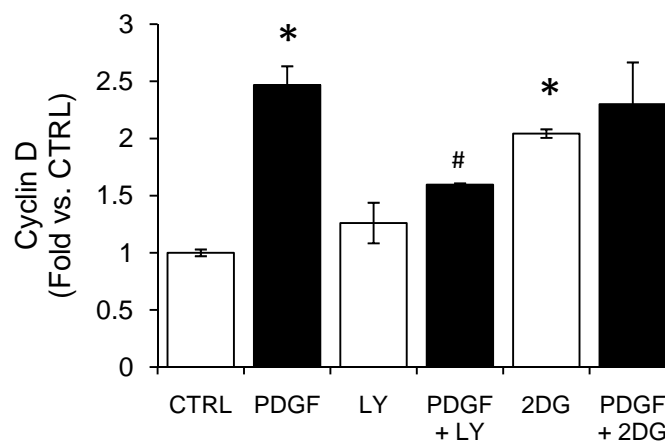

Supplementary Figure 3

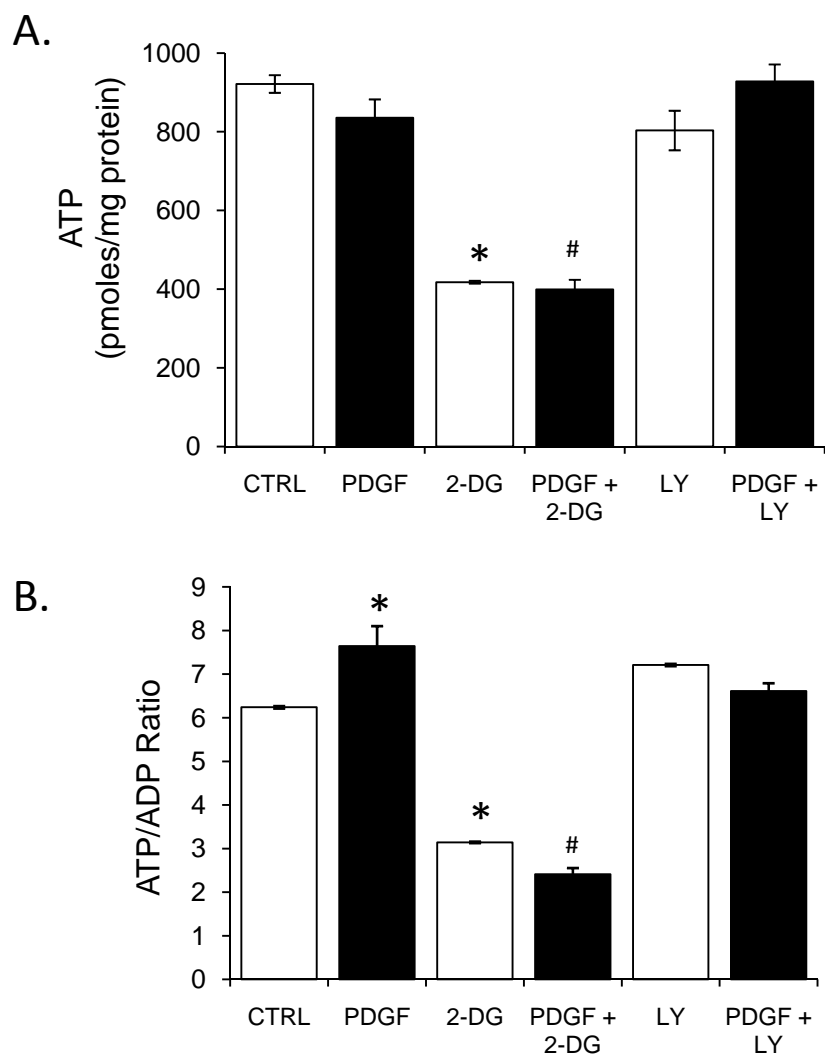

Supplementary Figure 4

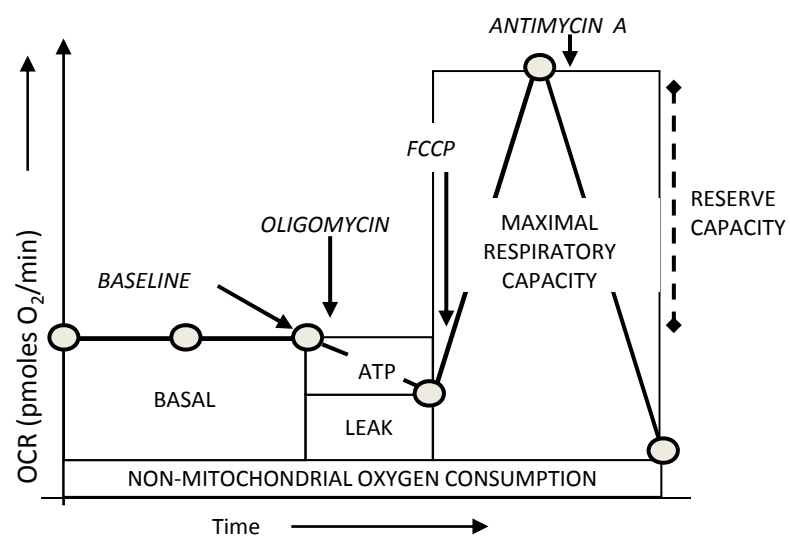

# Supplementary Figure 5

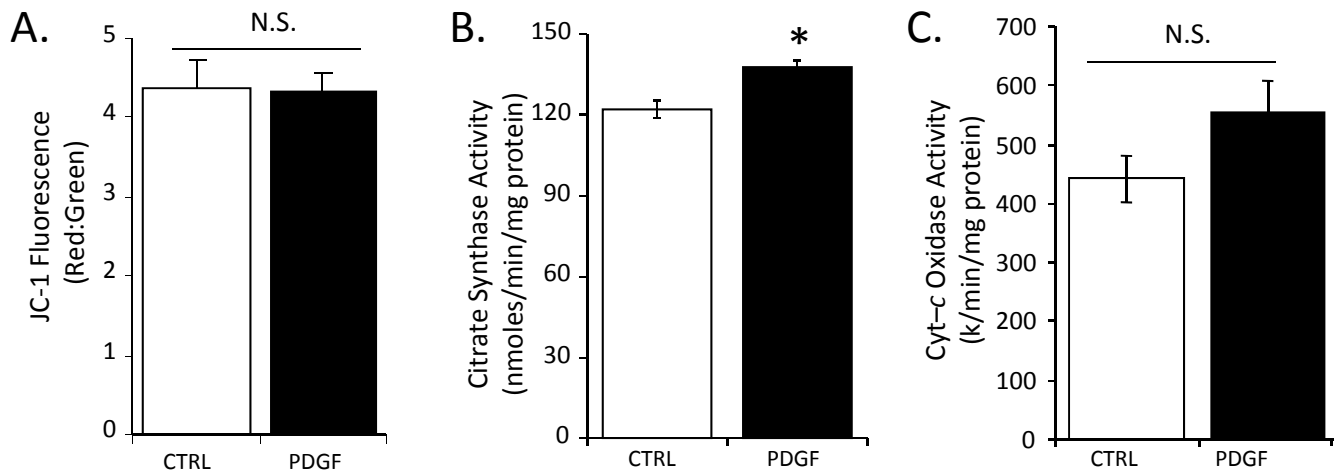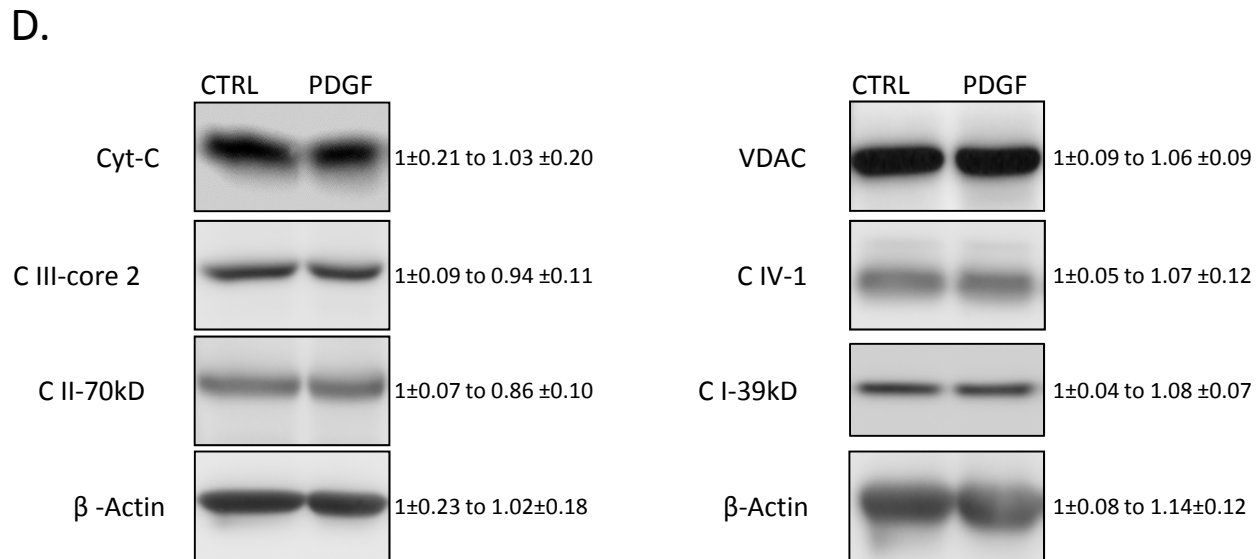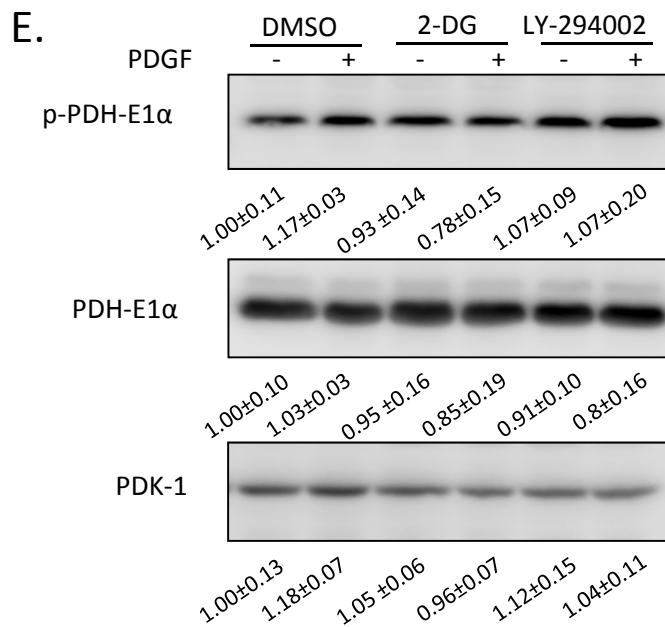

Supplement: NIHMS455970-supplement-Supplemental_Figures.pdf [file NIHMS455970-supplement-Supplemental_Figures.pdf]
